1 Charting is Never Exciting: Measuring Physician Time Use in Medical Dramas

2

3 Authors: Katelin C Jackson, Kayla A Miller, Samantha M Hill, Stephanie S. Johnson,

4 Laila A. Reimanis, Eric T Lofgren

5

6 Paul G. Allen School of Global Health, Washington State University, Pullman, WA USA,

7 Katelin C Jackson, Doctoral Candidate

8 Paul G. Allen School of Global Health, Washington State University, Pullman, WA USA,

9 Kayla A Miller, Research Assistant

10 Paul G. Allen School of Global Health, Washington State University, Pullman, WA USA,

11 Samantha M Hill, Research Assistant

12 Paul G. Allen School of Global Health, Washington State University, Pullman, WA USA,

13 Stephanie S Johnson, Doctoral Candidate

14 Paul G. Allen School of Global Health, Washington State University, Pullman, WA USA,

15 Laila A. Reimanis, Research Assistant

16 Paul G. Allen School of Global Health, Washington State University, Pullman, WA USA,

17 Eric T Lofgren, Associate Professor

18

19 Corresponding Author:

20 Eric Lofgren, PhD

21 Address: Allen Center

22 PO Box 647090

23 240 SE Ott Road

24 Pullman, WA 99164, USA

25 Email: Eric.Lofgren@wsu.edu

26

27 Running title: Measuring Physician Time Use in Medical Dramas

28 Word Count: 3697

29 Keywords: Medical Dramas, Time Use Patterns, Health care workers, Observational

30 Studies

31

32

33 **Abstract**

34 *Objectives:* This study aimed to explore the use of medical dramas to train observers  
35 when in-person observations or patient contact in clinical settings is impossible. The  
36 study also assessed the media's portrayal of the medical profession and compared time  
37 use patterns in medical dramas to previous hospital observational studies.

38 *Design:* Activity-pattern observational study using Work Observation by Activity Timing  
39 software.

40 *Setting:* The hospital, ICU, and community settings of medical television shows.

41 *Participants:* The first and last season of the main cast of three medical dramas; Grey's  
42 Anatomy, Scrubs, and ER.

43 *Main outcome measures:* Inter-rater reliability scores were used to assess how well  
44 medical dramas can be used as a training tool for observers. Proportions of time spent  
45 on daily medical tasks were compared to other in-person hospital studies.

46 *Results:* Grey's Anatomy and Scrubs had excellent Intraclass Correlation Coefficients  
47 (ICC) scores for a general medical setting, with Grey's Anatomy ICC scores for Season 1  
48 0.99 (0.97 to 1.0), and Season 16 0.98 (0.90 to 1.0) and Scrubs ICC scores of 0.91 (0.65 to  
49 0.98) for Season 1 and 0.91 (0.55, 0.99) for Season 8. In contrast, ER had an acceptable  
50 ICC score of 0.89 (0.59 to 0.98) for Season 1 and 0.81 (0.35 to 0.96) for Season 15 and  
51 might be more suitable for studies exploring activity patterns in the Emergency  
52 Department. All had p-values of <0.001.

53 *Conclusions:* Medical dramas can serve as training tools when clinical observation is  
54 limited or impossible, and our methods reflect these shows' ease of use and flexibility.  
55 Additionally, medical dramas can be selected for their similarity to in-person studies.  
56 Still, one should be mindful that inaccuracies in the representation of clinical activity

57 patterns are present. However, using medical dramas to train research staff in direct

58 observation is a feasible and reliable method.

59

## 60 INTRODUCTION

61 Activity patterns of healthcare professionals (HCP) can have far-reaching implications for the  
62 hospital patient-care mission. Prior studies have repeatedly shown that nurse burnout and the  
63 work environment have a significant impact on patient outcomes in hospitals [1-3]. The literature  
64 on time use and work environment in small to mid-sized community hospitals is limited, and  
65 direct empirical estimates are currently lacking. Publications in human health have shown that  
66 when directly observing HCPs and recording what activities they perform throughout their day  
67 and how often, we can quantitatively assess their time use [4–6]. The Work Observation Method  
68 By Activity Timing (WOMBAT) framework has been used to observe the time spent on daily  
69 tasks of HCPs [4, 7, 8].

70 Previous studies have used proximity sensors or direct observations to obtain contact rates  
71 which are essential for understanding infectious disease transmission. Sensors have been used  
72 to create contact networks in schools [9–12] and healthcare settings [13–15] to understand  
73 infectious disease spread. Hospital-based studies that have used sensors measure the effect of  
74 HCP number of contacts and the duration of contacts on incidence in patients [13, 15].  
75 However, proximity sensors only record where a healthcare professional (HCP) has been and  
76 not what they do. These studies also require a fair amount of infrastructure and, thus, are most  
77 commonly conducted in large academic medical centers. Few, if any, sensor-based studies  
78 have been conducted in smaller rural or community hospitals.

79 Direct observation provides more contextual information than sensor-based data; it informs  
80 us on what's actually being done by HCPs throughout the day. These activity patterns can  
81 elucidate their patient contact times, who they are in contact with (patient or colleague), and  
82 how they spend their overall time. Direct observation has been used to estimate contact  
83 parameters to inform analysis on infectious disease spread [13]. While less resource intensive  
84 to deploy than sensor-based systems, these methods rely on direct observations, and those

85 making the observations must be adequately trained. Before the pandemic, a study had been  
86 planned in a small critical access community hospital in Eastern WA to address the lack of time  
87 use estimates in these types of settings. However, the pandemic disrupted the ability to conduct  
88 in-person hospital observations due to the infection risk to and from observers; we were forced  
89 to find alternative methods to train observers.

90

## 91 **Objectives**

92 In this paper, we explore the use of medical dramas as a means of training observers when  
93 in-person observations or patient contact is inaccessible and assessing how the medical  
94 profession is portrayed in media. Additionally, we compare time use patterns of observed  
95 medical professionals in medical dramas to previously published results from varying hospital  
96 settings [4, 7, 8, 16–18].

## 97 **METHODS**

### 98 **Medical Dramas**

99 We selected a variety of medical dramas that represented the daily life of medical  
100 professionals, were medically accurate, and were entertaining, namely Grey’s Anatomy, Scrubs,  
101 and ER. Mitrokostas, a writer for The Insider — an independent online newspaper, consulted  
102 with various doctors and nurses to get their opinions on popular medical shows for their  
103 newsletter. Scrubs was deemed the most accurate medical comedy show, with some doctors  
104 mentioning “how Scrubs is one of the few medical shows that feels like it was written for  
105 doctors” [19]. The show accurately represents what occurs in a hospital on a day-to-day basis  
106 and the lives of young resident doctors; it was also the most medically precise.

107 ER centered around the lives of medical professionals in the emergency department. The  
108 doctors and nurses interviewed commented that ER did well in its portrayal of the fast-paced

109 nature of the emergency room and the hectic and exhausting lifestyle of an emergency-care  
110 physician [19]. They also mentioned the high medical accuracy of the show, from the proper use  
111 of medical jargon to the portrayal of roles and responsibilities of the medical staff and patient  
112 representation. However, a doctor commented that the show took creative liberties with the job  
113 duties of medical residents, with them doing work they wouldn't normally do as ER residents  
114 [19].

115 On the other hand, Grey's Anatomy was rated to be the least medically accurate but highly  
116 entertaining among the doctors and nurses interviewed. The most common comments about the  
117 inaccuracies of the show were that "interns would never perform surgery without a more  
118 experienced physician, hospital superiors being ignored or bypassed, and mistakes being made  
119 by residents and them not facing appropriate repercussions" [19]. Another fallacy of the show  
120 was that doctors and residents were equally proficient in all types of medicine, such as a  
121 "surgical resident delivering babies or involved in complex internal medicine cases" [19].

122

## 123 **Observers And Observations**

124 Observers were undergraduate students in Applied Mathematics and Biology-Pre-Medical  
125 who completed their education in Spring 2022 and 2023; they were employed as Research  
126 Assistants at Washington State University. They used each medical drama's first two or three  
127 episodes as training and orientation. Observers used the following episodes for training, Grey's  
128 Anatomy: "A Hard Day's Night", "The First Cut is the Deepest", "Winning a Battle, Losing A  
129 War", and "Put on A Happy Face", Scrubs: "My First Day" and "My Mentor", ER: "24 hours" and  
130 "Day One". During this time, observers became familiar with the TV show, the cast, the  
131 software, and the work definitions. Observers were also allowed to confer with each other on  
132 software use and clarify work definitions. Observations were carried out for each medical  
133 drama's first and last seasons at the time of the study. Respectively, these seasons were 1 & 16

134 for Grey's Anatomy, 1 & 8 for Scrubs, and 1 & 15 for ER. For each season, a member of the  
135 main cast was assigned a number; then, a matching number was assigned to each episode by  
136 a random number generator. The selected cast member kept their assigned number for both  
137 seasons; however, a new number was assigned if there was a new cast member in a later  
138 season.

139

## 140 **Activity Timing**

141 Observers used the Work Observation Method By Activity Timing (WOMBAT) software on  
142 the SAMSUNG Galaxy Tab A and iPad Mini tablets. Observers begin recording tasks by  
143 selecting what was being done ("What"), whom they were interacting with ("Who"), how they  
144 were interacting with an individual ("How"), and where that interaction took place ("Where") and  
145 pressing a button which records the task's start time. When the observed (participant) begins a  
146 new task, more tasks can be selected by pressing the 'enter' button.

147 Additionally, the WOMBAT software allows interruptions and multitasking by pressing the  
148 'interrupt' button or the 'multitask' button. Television shows have a scripted but structured  
149 dialogue, and medical dramas are no different, which is why there were hardly any interruptions  
150 being observed. However, when a character had to stop performing an activity and start a new  
151 task; then, an interruption was recorded. Observers enter the information for the first task, press  
152 the 'interrupt' button, and enter the information for the second task. When multitasks occur, the  
153 observer must press the 'add' button before pressing the 'enter' button. If more than one task  
154 has ended, individual tasks can be stopped by pressing the 'end multi' button. The software  
155 requires that at least one task be running at all times. After an observation period (in this case,  
156 an episode), the recorded data is uploaded to a cloud server.



## 157 **Modifications to the Baseline WOMBAT Definitions**

158 This study primarily used the work definitions from Ballerman et al. 2011. Several categories  
159 were added or modified to fit the needs of our study and accommodate the nuances of  
160 television. For example, in the “Where” category, “Community”, “ICU,” and “Hospital” were  
161 added as options. For the “What” category, “Nothing Happening” was added for periods where  
162 dramatic pauses ensured no activities were occurring, and “Offscreen” was added to account for  
163 times when the subject of observation was not on screen to be observed. The work definitions  
164 are provided in Table 1.

165

166 **Table 1. Medical Drama Work Definitions**

| <b>Category</b>            | <b>Definition</b>                                         | <b>Examples</b>                                                                                                                                                        |
|----------------------------|-----------------------------------------------------------|------------------------------------------------------------------------------------------------------------------------------------------------------------------------|
| Direct Care                | Any activity directly related to patient care             | <ul style="list-style-type: none"><li>• Examining/reviewing a patient</li><li>• Performing medical procedures</li><li>• Taking a history</li></ul>                     |
| Indirect Care              | Any activity indirectly related to patient care           | <ul style="list-style-type: none"><li>• Planning care and ordering tests</li><li>• Retrieving information</li><li>• Checking results</li><li>• Washing hands</li></ul> |
| Document                   | Any recording of patient information on paper or computer | <ul style="list-style-type: none"><li>• Writing on a temporary record</li><li>• Writing in patients’ notes</li></ul>                                                   |
| Professional Communication | Any work-related discussion with another staff member     | <ul style="list-style-type: none"><li>• Requesting medical or nursing consult or review</li><li>• Planning care with any health professional</li></ul>                 |

---

|                   |                                                                                               |                                                                                                                                                                  |
|-------------------|-----------------------------------------------------------------------------------------------|------------------------------------------------------------------------------------------------------------------------------------------------------------------|
| Administration    | Any administrative activity that is not related to direct or indirect individual patient care | <ul style="list-style-type: none"><li>• Duty rosters</li><li>• Employment issues</li><li>• Bed allocations</li><li>• Coordination of staff activities</li></ul>  |
| In Transit        | Work-related movement between patients and between task                                       | <ul style="list-style-type: none"><li>• Movement when the participant exits a patient room</li><li>• Traveling to a new room with or without a patient</li></ul> |
| Education         | Active supervision or teaching of another staff member or student                             | <ul style="list-style-type: none"><li>• Attending education sessions (e.g., grand rounds)</li></ul>                                                              |
| Social            | Any social or personal activity or discussion                                                 | <ul style="list-style-type: none"><li>• Personal phone calls</li><li>• Personal breaks</li><li>• Bathroom breaks</li></ul>                                       |
| Off Screen        | The character is not in the scene                                                             |                                                                                                                                                                  |
| Nothing Happening | Character is not contributing to medical or social tasks                                      | <ul style="list-style-type: none"><li>• In the background</li><li>• Not performing any relevant tasks</li><li>• Commercial or Advertisement breaks</li></ul>     |

---

167

168

## 169 **Statistical Analysis**

170 A preliminary data cleaning was performed in Excel, then imported into R statistical software

171 (v4.2.1) for further analysis on the proportion of time spent on each categorical task for both the

172 first and last season of all medical dramas [20–22]. Descriptive statistics were used to  
173 determine the total observation time, total time per task, and frequency of tasks. The proportion  
174 of time spent on tasks and 95% confidence intervals were calculated.

175 For medical dramas to be an effective training tool, observers should reach the same  
176 conclusion. As such, we also considered inter-rater reliability. We used the Intraclass  
177 Correlation Coefficient (ICC) via the ‘psych’ R package (v 2.2.9) [23] to measure the strength of  
178 inter-rater agreement for continuous variables. A high ICC, close to one, has more agreement  
179 between observers. However, an ICC close to zero has less agreement between observers [24],  
180 [25]. Values between 0.8 (80%) and 0.89 (89%) are considered good inter-rater reliability, while  
181 0.9 (90%) and 1 (100%) are considered excellent inter-rater reliability [25]. A Chi-square  
182 independence test was used to determine the association between each medical drama's first  
183 and last seasons, gender, and the tasks being performed. A Fishers Exact test was used when  
184 appropriate due to small cell counts.

185

## 186 **Human Subjects**

187 This research was determined not to constitute human subjects research by the Washington  
188 State University Institutional Review Board.

## 189 **Patient and Public Involvement**

190 Patients and the public were not involved in any way in this research study.

## 191 **RESULTS**

192 We observed 5883 separate tasks across the three chosen medical dramas—the main  
193 characters were observed for a total time of 38.72 hours.

## 194 **Grey's Anatomy**

195 Season 1 of Grey's Anatomy had higher proportions of time spent (29.1%, 95%CI: 28.4% to  
196 29.9%) on direct care tasks. When compared to the latest season, which revealed a decrease in  
197 medical tasks but had higher proportions of time spent on social tasks. Professional  
198 Communication varied slightly but was the most consistent medical task completed for the  
199 seasons compared to other activities (Figure 1). Compared to existing observations from  
200 Ballerman et al. 2011, Westbrook et al. 2008, and Westbrook et al. 2010, both seasons  
201 dramatically overrepresent physicians' time directly caring for patients and underrepresenting  
202 their administrative duties. Overall, Grey's Anatomy had more females spending more time on  
203 tasks than males, with similar activity patterns between seasons 1 and 16 (Figure 2). As with  
204 our previous results for Grey's Anatomy, professional communication was higher for both  
205 seasons, (Season 1: 29.3%, 95%CI: 28.5% to 30%) (Season 16: 29.1%, 95%CI: 28.4% to  
206 29.7%), followed by direct care tasks (Season 1: 23.5%, 95%CI: 22.8 % to 24.2%) (Season 16:  
207 15.8%, 95%CI:15.3% to 16.3%). Moreover, the time spent on social tasks increased among  
208 males in season 16 from 1.2% (95%CI: 1.0% to 1.4%) to 11.1% (95%CI: 10.6% to 11.5%), while  
209 direct care tasks decreased between females to 15.8% (95%CI: 15.2 to 16.3).

210 A Fisher's Exact test was performed to determine the relationship between Grey's Anatomy  
211 seasons and the tasks performed. The relationship between these variables was significant,  $p <$   
212 0.001. Gender was also considered; we found a significant association between gender and  
213 tasks when conducting a chi-square independence test,  $X^2 (6, N= 1117) = 99.48, p < 0.001$ . The  
214 ICC was computed to assess the agreement between two observers in observing medical  
215 residents' and physicians' time use patterns in Grey's Anatomy. Critically, for a training tool,  
216 inter-rater reliability was excellent, with an ICC of 0.99 and 0.98 for seasons 1 and 16,  
217 respectively.

218

## 219 **Scrubs**

220 Scrubs spent more time on social tasks (56.9%, 95%CI: 56.1% to 57.7%) in Season 8 than  
221 in the other medical dramas. Hardly any time was spent on medical tasks and administrative  
222 duties in Season 1 and Season 8 (Figure 3). But compared to Walter et al. 2014 and others [4,  
223 18], Scrubs is comparable with the realities of medical professionals' daily duties with direct care  
224 tasks (Season 1: 8.7%, 95%CI: 7.8% to 8.5%) (Season 8: 3.5%, 95%CI: 3.3% to 3.8%).  
225 Although indirect care tasks (Season 1: 4.9%, 95%CI: 4.7% to 5.2%) (Season 8: 2.6%, 95%CI:  
226 2.4% to 2.9%) were only similar to Ballerman et al. 2011 findings. However, administrative tasks  
227 were underrepresented. Professional communication and social tasks had similar proportions of  
228 time spent in season 1, with 39.6% (95%CI: 39.0% to 40.2%) and 36.4% (95%CI: 35.8% to  
229 37.0%), respectively. Males contributed more to social tasks in both seasons than females at  
230 29.6% (95%CI: 29.1% to 30.2%) and 48.2% (95%CI: 47.4% to 49.0%) (Figure 4). Direct care  
231 tasks were about equal in season 8, but males spent more time on direct care tasks than  
232 females in season 1. Time spent on professional communication decreased among males from  
233 34% (95%CI: 33.4% to 34.6%) to 19.3% (95%CI: 18.7% to 19.9%). And there weren't any  
234 drastic changes in female activity patterns for either season.

235 A chi-square test of independence showed a significant relationship between Scrubs  
236 seasons and tasks performed,  $X^2(7, N= 1797) = 67.21, p < 0.001$ , and showed a significant  
237 association between gender and time use patterns,  $X^2(7, N= 1797) = 17.041, p = 0.017$ . The  
238 ICC was computed to assess the agreement between two observers in observing medical  
239 residents' and physicians' time use patterns in Scrubs. The inter-rater reliability was excellent,  
240 with an ICC of 0.91 for seasons 1 and 8.

241

## 242 **ER**

243 ER had the highest percent time spent on direct care tasks (Season 1: 36.2%, 95%CI:

244 35.7% to 36.7%) (Season 15: 43.8%, 95%CI: 43.3% to 44.4%) in both Season 1 and Season 15  
245 than any other observed medical drama. Characters were consistent with performing  
246 professional communication (Season 1: 28.3%, 95%CI: 27.8% to 28.7%) (Season 15: 29.3%,  
247 95%CI: 28.8% to 29.8%) and social tasks (Season 1: 17.4%, 95%CI: 7.8% to 8.5%) (Season  
248 15: 17.2%, 95%CI: 17.0% to 17.8%) (Figure 5). Interestingly, ER had the lowest proportion of  
249 time spent on social tasks but the highest on in-transit duties (Season 1: 12.4%, 95%CI: 12.0%  
250 to 12.7%) (Season 15: 7.6%, 95%CI: 7.3% to 7.9%). Most studies have focused on general  
251 practice or ICU physicians' activity patterns. Still, ER had similar proportions of time spent on  
252 professional communication but higher in direct care tasks (Season 1: 36.2%, 95%CI: 35.7% to  
253 36.7%) (Season 15: 43.8%, 95%CI: 43.3% to 44.4%) compared to other studies interested in the  
254 activity patterns of the Emergency Department [4, 16]. Throughout both seasons, females and  
255 males showed the same activity patterns between direct care, professional communication, and  
256 social tasks, with males contributing to these tasks most of the time (Figure 6).

257 A Fishers Exact test was performed to determine the relationship between ER seasons and  
258 the tasks performed. The relationship between these variables was significant,  $p < 0.001$ . On  
259 the other hand, we found a non-significant association between gender and time use patterns,  $p$   
260 = 0.4762. Lastly, the ICC was computed to assess the agreement between two observers in  
261 observing physicians' time use patterns in ER. Inter-rater reliability was good for ER, with an  
262 ICC of 0.89 and 0.81 for seasons 1 and 15, respectively.

## 263 **DISCUSSION**

264 Overall, the medical dramas chosen do an adequate job of portraying the medical profession  
265 in media, apart from Grey's Anatomy. Both seasons of Grey's Anatomy dramatically  
266 overrepresent physicians' time directly caring for patients and underrepresent their  
267 administrative duties compared to Ballerman et al. 2011, Westbrook et al. 2008, and Westbrook  
268 et al. 2010; but was close to Walter et al. 2014 in professional communication. Scrubs spent

269 more time on social tasks than the other medical dramas, and when compared to other studies,  
270 Scrubs was similar to the daily duties of medical professionals, with direct care tasks (Season 1:  
271 8.7%; Season 8: 3.5%) being reasonably close to Ballerman et al. 2011 (~10%) [4], Göras et al.  
272 2019 (4.4%) [18], and Walter et al. 2014 (8.2%) [17] but underrepresented when compared to  
273 Westbrook et al. 2008 (15%) [7], and Westbrook et al. 2010 (28.6%) [16]. Additionally, Scrubs  
274 had similar time use patterns to Westbrook et al. 2008 [7], Westbrook et al. 2010 [16], and Walter  
275 et al. 2014 [17] regarding professional communication but had lower activity patterns when  
276 compared to Ballerman et al. 2011 [4] and Göras et al. 2019 [18].

277 Comparatively, ER does well in capturing emergency medicine's fast-paced and hectic  
278 nature. ER had the highest direct care tasks in season 1 at 36.2% and season 15 at 43.8% than  
279 the other medical dramas observed and the lowest in social tasks in season 1 at 17.4% and  
280 season 15 at 17.2%. Furthermore, direct care tasks were also observed to be either higher than  
281 or on par with other studies observing the emergency department [4, 7, 8, 16, 17]. Regardless  
282 of department, social tasks observed in hospital studies were either lower or on par with  
283 observations from ER [7, 8, 16, 17].

284 Our results showed that Grey's Anatomy and Scrubs had statistically significant differences  
285 in clinician time use patterns by gender. Both medical shows favored one gender over the other.  
286 Females in Grey's Anatomy dominated daily medical and social tasks for both seasons. Still,  
287 males increased their social time in season 16 while females decreased their direct care  
288 medical duties. On the other hand, Scrubs had a drastic difference in professional  
289 communication and social interactions between males and females, with males leading overall  
290 in both seasons. Additionally, both genders shared equal time spent on direct care tasks in  
291 season 8, but the activity only accounted for 1.9% (95%CI: 1.6% to 2.1%) for females and 1.7%  
292 (95%CI: 1.5% to 1.9%) for males which was a decrease for males in season 1 at 6.7% (95%CI:  
293 6.4% to 7.0%). A description of the full nature of these differences – including whether these  
294 differences cast a positive or negative light on one gender is explainable by the relative

295 prominence of actors or proportional to screen time, etc. is beyond the scope of this study.

296 Beyond the time use estimates themselves, this study does demonstrate consistently high  
297 observer agreement, as expressed in Intraclass Correlation Coefficients. Even the lowest ICC,  
298 seen in the last season of ER (0.81), would be considered “Good” under most circumstances.  
299 This suggests that, while the exact distribution of activities may not be relatable to actual clinical  
300 settings, this approach does provide a means of consistently and reliably familiarizing observers  
301 with the mechanics of recording observations and mapping what they see to broad categories of  
302 activity.

303 Medical dramas can serve as training tools when clinical observation is impossible. Medical  
304 dramas can be selected for their similarity to an in-person study. Beyond circumstances such as  
305 the COVID-19 pandemic, where observation is impossible, the use of medical dramas to train  
306 observers may also have use as an initial method of orienting and training, which can include  
307 avoiding or limiting patient care observations during this period. Additionally, using medical  
308 dramas with the WOMBAT software allows for a more flexible and accessible training period  
309 and not be limited to the HCP schedules. Direct observation of patient care is a time-consuming  
310 process for both the observer and the observed clinician and requires patients to consent for an  
311 observer to be present while they are being treated. Given these demands, a method for  
312 training observers on the software involved, familiarizing them with activity definitions, and  
313 addressing any questions that might arise that take place in a non-clinical setting may be  
314 extremely valuable.

315 One of the limitations of this study is that medical dramas do not accurately represent  
316 hospitals’ or healthcare professionals’ daily tasks. A direct comparison of the time use patterns  
317 from the selected medical dramas to real-world observations is unlikely to be directly productive,  
318 save for highlighting the differences in how the media portrays clinical medicine and the reality  
319 of it. Unsurprisingly, administrative duties and documentation were underrepresented in all  
320 medical dramas when compared to observations made in hospital observation studies [4, 7, 8,



321 16, 17]. This is not unreasonable – few would argue that charting and other administrative tasks  
322 make for riveting television.

323 For general medical settings, Grey’s Anatomy and Scrubs had excellent ICC scores, while  
324 ER had acceptably high ICC scores and might be more suitable for studies planned to involve  
325 the Emergency Department. Our methods reflect the ease of use and flexibility of medical  
326 dramas as a training tool for when in-person observations are limited or infeasible. When using  
327 these shows, however, one should be mindful that inaccuracies in the representation of clinical  
328 time use are present and that there are potentially biased portrayals of how male versus female  
329 clinicians spend their time. Given those limitations, however, we believe the use of medical  
330 dramas to train research staff in direct observation techniques is both a feasible and reliable  
331 technique.

332

333 What is already known on this topic

- 334
- WOMBAT is a reliable tool for in-person hospital observation studies.
  - Time use patterns of healthcare professionals have vast importance in understanding  
336 hospital burnout, contact patterns, and infectious disease spread.

337 What this study adds

- 338
- Medical dramas can be used to train observers when in-person training is either  
339 impractical or infeasible.
  - Our results have shown that observers trained on medical dramas have similar inter-  
341 rater reliability scores as those trained in a hospital setting.
  - Medical dramas can be used as an initial training method to avoid or limit patient care  
343 observations.

344

345

346 **REFERENCES:**

- 347 1. Jennings BM. Work Stress and Burnout Among Nurses: Role of the Work Environment and  
348 Working Conditions. In: Hughes RG, editor. Patient Safety and Quality: An Evidence-  
349 Based Handbook for Nurses [Internet]. Rockville (MD): Agency for Healthcare Research  
350 and Quality (US); 2008 [cited 2019 Sep 28]. (Advances in Patient Safety). Available from:  
351 <http://www.ncbi.nlm.nih.gov/books/NBK2668/>
- 352 2. Duffield C, Diers D, O'Brien-Pallas L, Aisbett C, Roche M, King M, et al. Nursing staffing,  
353 nursing workload, the work environment and patient outcomes. *Appl Nurs Res*. 2011  
354 Nov;24(4):244–55.
- 355 3. Copanitsanou P, Fotos N, Brokalaki H. Effects of work environment on patient and nurse  
356 outcomes. *Br J Nurs*. 2017 Feb 9;26(3):172–6.
- 357 4. Ballermann MA, Shaw NT, Mayes DC, Gibney RN, Westbrook JI. Validation of the Work  
358 Observation Method By Activity Timing (WOMBAT) method of conducting time-motion  
359 observations in critical care settings: an observational study. *BMC Med Inform Decis Mak*.  
360 2011 May 17;11(1):32.
- 361 5. Ward NS, Read R, Afessa B, Kahn JM. Perceived effects of attending physician workload  
362 in academic medical intensive care units: A national survey of training program directors\*.  
363 *Crit Care Med*. 2012 Feb;40(2):400–5.
- 364 6. Westbrook JI, Duffield C, Li L, Creswick NJ. How much time do nurses have for patients? a  
365 longitudinal study quantifying hospital nurses' patterns of task time distribution and  
366 interactions with health professionals. *BMC Health Serv Res*. 2011 Dec;11(1):319.
- 367 7. Westbrook JI, Ampt A, Kearney L, Rob MI. All in a day's work: an observational study to  
368 quantify how and with whom doctors on hospital wards spend their time. *Med J Aust*.  
369 2008;188(9):506–9.
- 370 8. Westbrook JI, Ampt A. Design, application and testing of the Work Observation Method by

- 371 Activity Timing (WOMBAT) to measure clinicians' patterns of work and communication☆.  
372 Int J Med Inf. 2009 Apr;78:S25–33.
- 373 9. Guclu H, Read J, Vukotich CJ, Galloway DD, Gao H, Rainey JJ, et al. Social Contact  
374 Networks and Mixing among Students in K-12 Schools in Pittsburgh, PA. Barrat A, editor.  
375 PLOS ONE. 2016 Mar 15;11(3):e0151139.
- 376 10. Toth DJA, Leecaster M, Pettey WBP, Gundlapalli AV, Gao H, Rainey JJ, et al. The role of  
377 heterogeneity in contact timing and duration in network models of influenza spread in  
378 schools. J R Soc Interface. 2015 Jul 6;12(108):20150279.
- 379 11. Leecaster M, Toth DJA, Pettey WBP, Rainey JJ, Gao H, Uzicanin A, et al. Estimates of  
380 Social Contact in a Middle School Based on Self-Report and Wireless Sensor Data.  
381 McVernon J, editor. PLOS ONE. 2016 Apr 21;11(4):e0153690.
- 382 12. Salathe M, Kazandjieva M, Lee JW, Levis P, Feldman MW, Jones JH. A high-resolution  
383 human contact network for infectious disease transmission. Proc Natl Acad Sci. 2010 Dec  
384 21;107(51):22020–5.
- 385 13. Hornbeck T, Naylor D, Segre AM, Thomas G, Herman T, Polgreen PM. Using Sensor  
386 Networks to Study the Effect of Peripatetic Healthcare Workers on the Spread of Hospital-  
387 Associated Infections. J Infect Dis. 2012 Nov 15;206(10):1549–57.
- 388 14. Obadia T, Opatowski L, Temime L, Herrmann JL, Fleury É, Boëlle PY, et al. Interindividual  
389 Contacts and Carriage of Methicillin-Resistant *Staphylococcus aureus*: A Nested Case-  
390 Control Study. Infect Control Hosp Epidemiol. 2015 Aug;36(8):922–9.
- 391 15. Lucet JC, Laouenan C, Chelius G, Veziris N, Lepelletier D, Friggeri A, et al. Electronic  
392 Sensors for Assessing Interactions between Healthcare Workers and Patients under  
393 Airborne Precautions. Colizza V, editor. PLoS ONE. 2012 May 25;7(5):e37893.
- 394 16. Westbrook JI, Coiera E, Dunsmuir WTM, Brown BM, Kelk N, Paoloni R, et al. The impact  
395 of interruptions on clinical task completion. BMJ Qual Saf. 2010 Aug 1;19(4):284–9.

- 396 17. Walter SR, Li L, Dunsmuir WTM, Westbrook JI. Managing competing demands through  
397 task-switching and multitasking: a multi-setting observational study of 200 clinicians over  
398 1000 hours. *BMJ Qual Saf.* 2014 Mar;23(3):231–41.
- 399 18. Göras C, Olin K, Unbeck M, Pukk-Härenstam K, Ehrenberg A, Tessma MK, et al. Tasks,  
400 multitasking and interruptions among the surgical team in an operating room: a prospective  
401 observational study. *BMJ Open.* 2019 May 15;9(5):e026410.
- 402 19. Mitrokostas S. Insider. [cited 2023 Jul 16]. Doctors and nurses rate 10 popular medical  
403 shows based on accuracy. Available from: [https://www.insider.com/experts-reveal-the-](https://www.insider.com/experts-reveal-the-least-and-most-accurate-medical-shows-2019-12)  
404 [least-and-most-accurate-medical-shows-2019-12](https://www.insider.com/experts-reveal-the-least-and-most-accurate-medical-shows-2019-12)
- 405 20. Wickham H, Hester J, Francois R, Bryan J, Bearrows S, Posit, et al. readr: Read  
406 Rectangular Text Data [Internet]. 2023 [cited 2023 Jul 16]. Available from: [https://cran.r-](https://cran.r-project.org/web/packages/readr/index.html)  
407 [project.org/web/packages/readr/index.html](https://cran.r-project.org/web/packages/readr/index.html)
- 408 21. Wickham H, Averick M, Bryan J, Chang W, D’Agostino McGowan L, François R, et al.  
409 Welcome to the {tidyverse}. *J Open Source Softw.* 2019;4(43):1686.
- 410 22. R Core Team. R: A language and environment for statistical computing. [Internet]. Vienna,  
411 Austria: R Foundation for Statistical Computing; 2022. Available from: [https://www.R-](https://www.R-project.org/)  
412 [project.org/](https://www.R-project.org/)
- 413 23. Revelle W. psych: Procedures for Psychological, Psychometric, and Personality Research  
414 [Internet]. 2023 [cited 2023 Jul 16]. Available from: [https://cran.r-](https://cran.r-project.org/web/packages/psych/)  
415 [project.org/web/packages/psych/](https://cran.r-project.org/web/packages/psych/)
- 416 24. Glan S. Statistics How To. 2016 [cited 2023 Jul 16]. Intraclass Correlation. Available from:  
417 <https://www.statisticshowto.com/intraclass-correlation/>
- 418 25. Koo TK, Li MY. A Guideline of Selecting and Reporting Intraclass Correlation Coefficients  
419 for Reliability Research. *J Chiropr Med.* 2016 Jun 1;15(2):155–63.
- 420

421 **Appendix**

422 **Figures and Figure Legends**

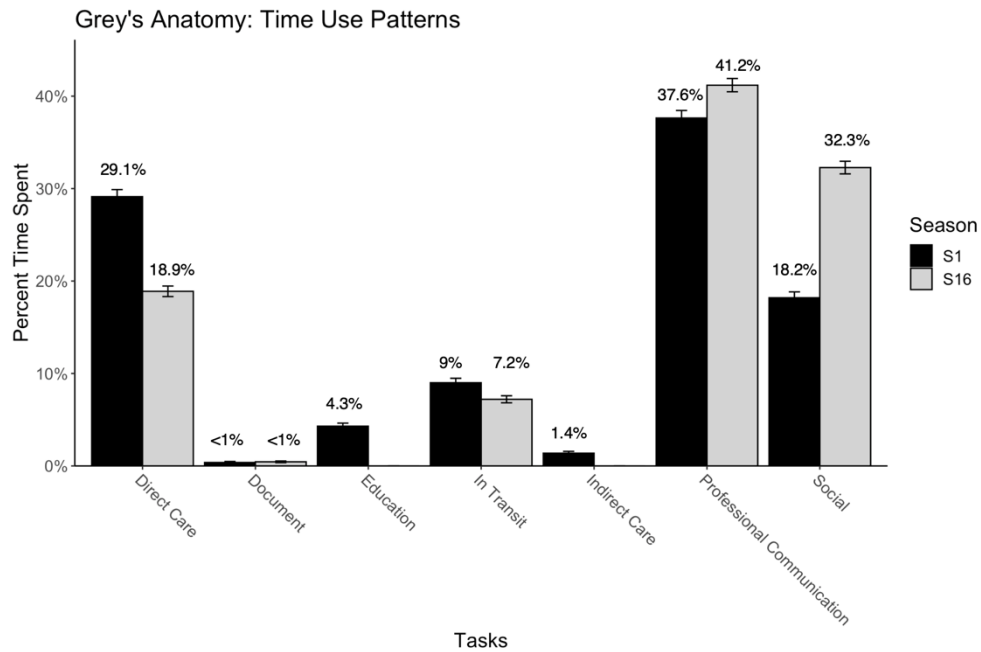

423 **Figure 1.** Percentage of time main characters spent on tasks during Grey's Anatomy's  
424 season 1 and season 16. Error bars are 95% confidence intervals.  
425

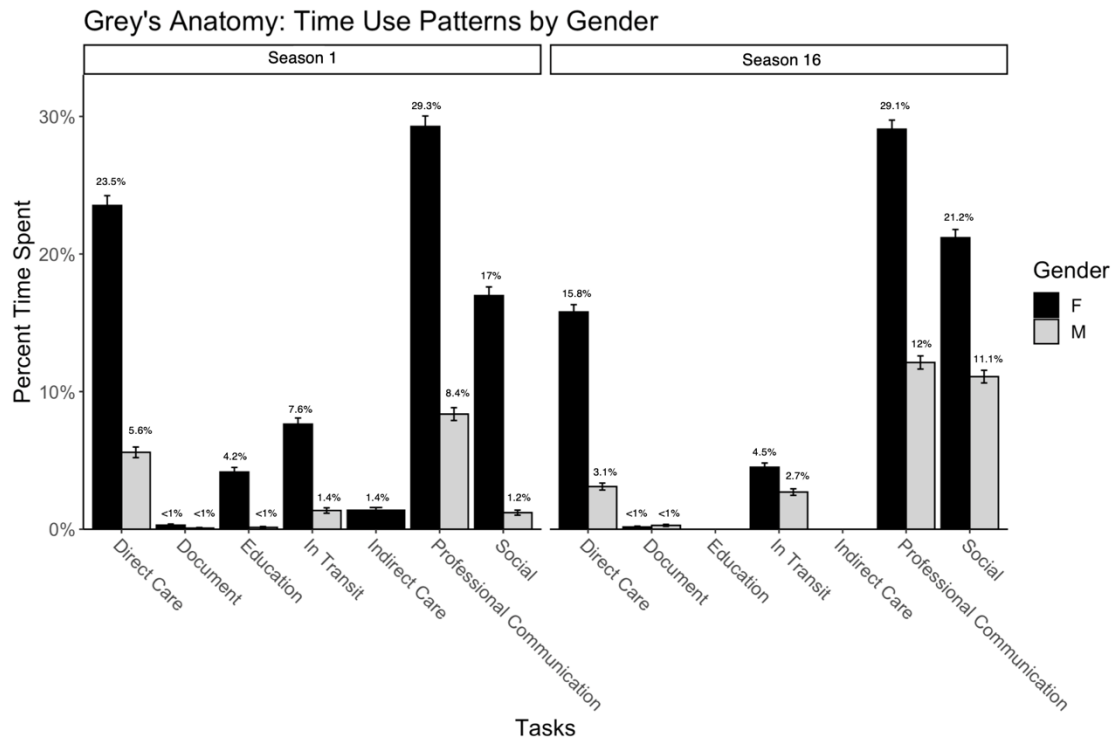

426

427 **Figure 2.** Percentage of time spent on tasks by gender during Grey's Anatomy's season

428 1 and season 16. Error bars are 95% confidence intervals.

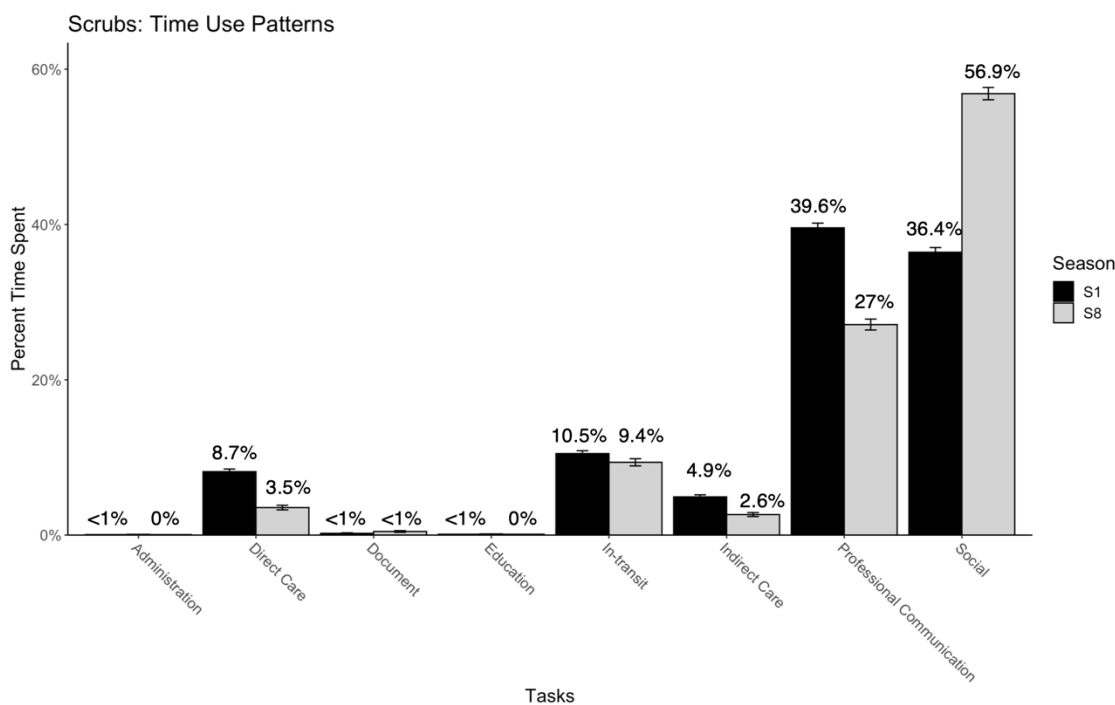

429

430 **Figure 3.** Percentage of time main characters spent on tasks during Scrubs season 1

431 and season 8. Error bars are 95% confidence intervals.

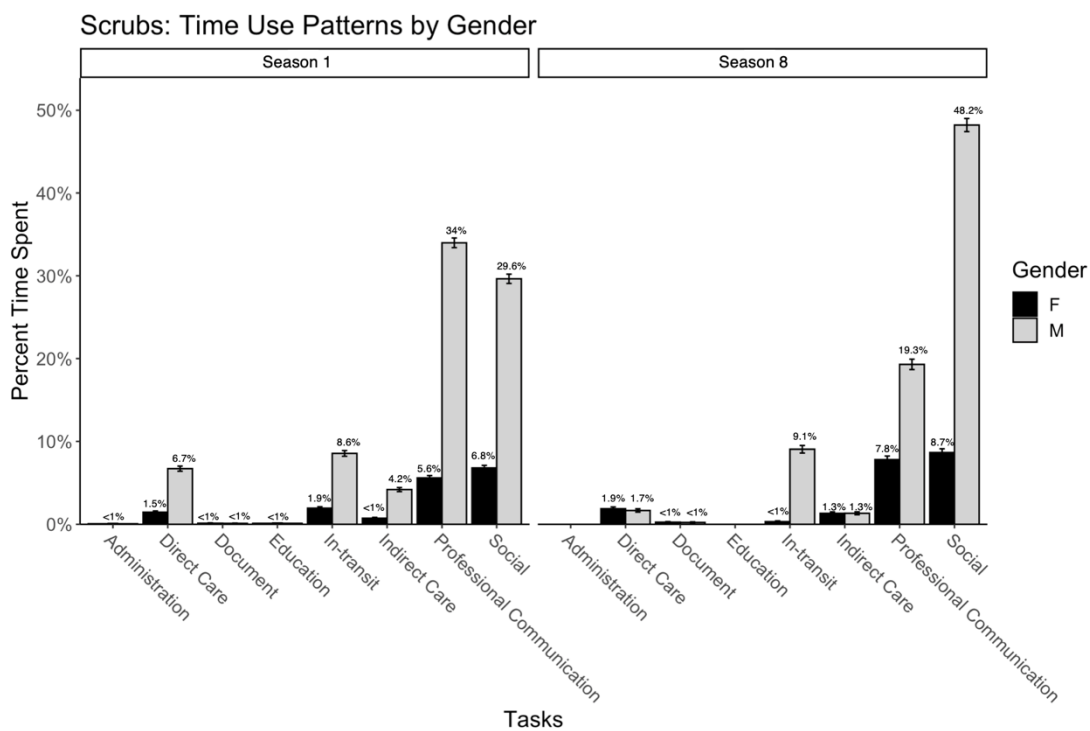

432

433 **Figure 4.** Percentage of time spent on tasks by gender during Scrubs season 1 and

434 season 8. Error bars are 95% confidence intervals.



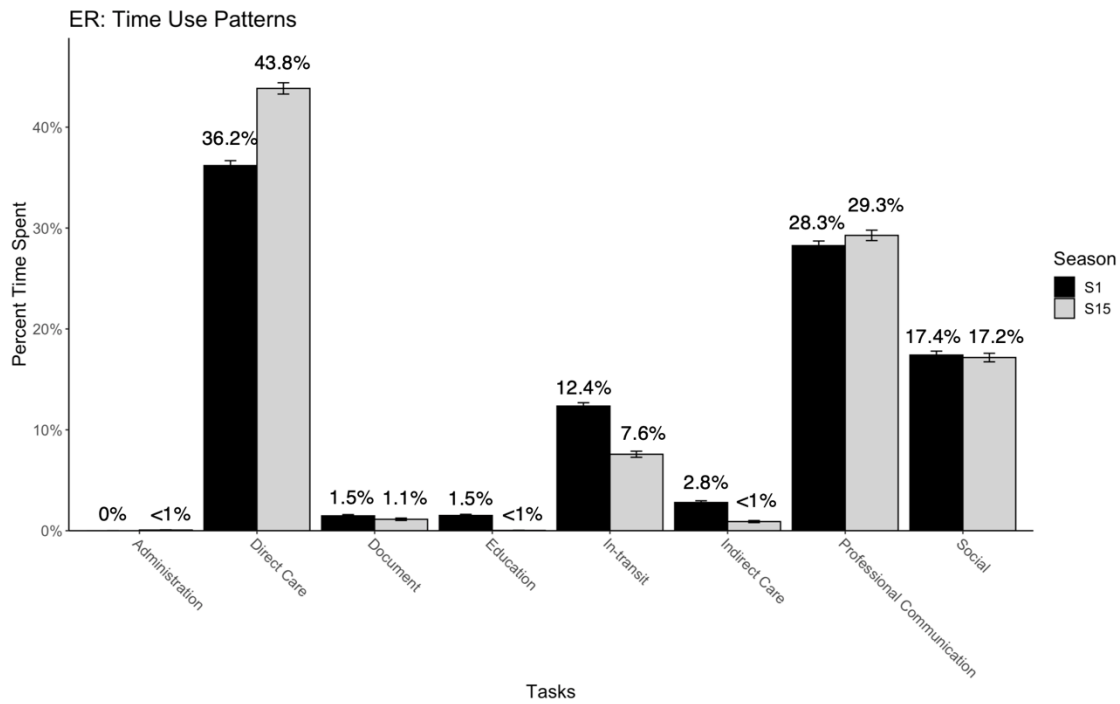

435

436 **Figure 5.** Percentage of time main characters spent on tasks during ER's season 1 and

437 season 15. Error bars are 95% confidence intervals.

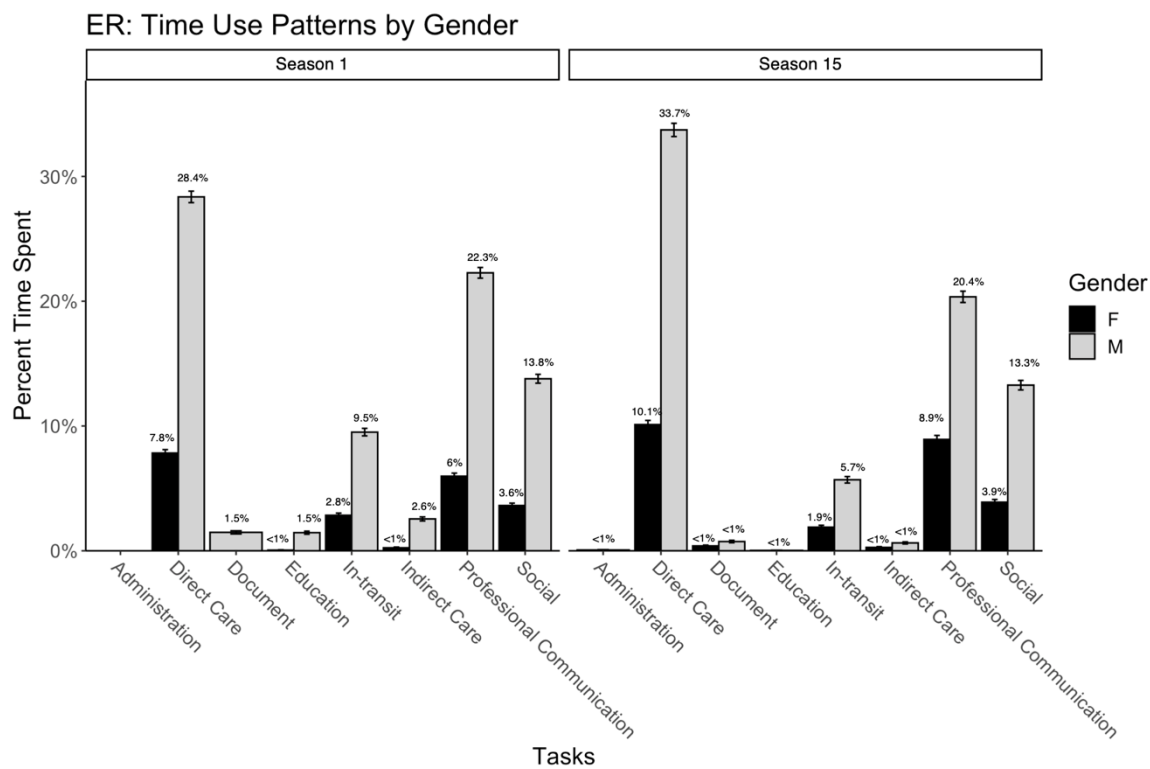

438

439 **Figure 6.** Percentage of time spent on tasks by gender during ER's season 1 and

440 season 15. Error bars are 95% confidence intervals.
